# Supplementary material
Source: ML conference proceedings conference paper supplement (https://aclanthology.org/2020.conll-1.30)
Supplement: OptionalSupplementaryMaterial [file 2020.conll-1.30.OptionalSupplementaryMaterial.zip]

# Word associations and the distance properties of context-aware word embeddings

**Maria A. Rodriguez**

Maria.AnduezaRodriguez@unige.ch

**Paola Merlo**

Paola.Merlo@unige.ch

## Supplementary materials

### Experiment 2.1

From Tversky and Gati (1978)

| List of countries |              | Updated list of countries |             |
|-------------------|--------------|---------------------------|-------------|
| USA               | Mexico       | USA                       | Mexico      |
| USSR              | Poland       | Russia                    | Poland      |
| China             | Albania      | China                     | Albania     |
| USA               | Israel       | USA                       | Israel      |
| Japan             | Philippines  | Japan                     | Philippines |
| USA               | Canada       | USA                       | Canada      |
| USSR              | Israel       | Russia                    | Israel      |
| England           | Ireland      | England                   | Ireland     |
| West Germany      | Austria      | Germany                   | Austria     |
| USSR              | France       | Russia                    | France      |
| Belgium           | Luxembourg   | Belgium                   | Luxembourg  |
| USA               | USSR         | USA                       | Russia      |
| China             | North Korea  | China                     | North Korea |
| India             | Ceylon       | India                     | Sri Lanka   |
| USA               | France       | USA                       | France      |
| USSR              | Cuba         | Russia                    | Cuba        |
| England           | Jordan       | England                   | Jordan      |
| France            | Israel       | France                    | Israel      |
| USA               | West Germany | USA                       | Germany     |
| USSR              | Syria        | Russia                    | Syria       |
| France            | Algeria      | France                    | Algeria     |

## Experiment 2.3

### List of hypernym/hyponym (He/Ho) verbs (Nelson et al., 2004)

| Hyponym  | Hyponym  | Hyponym  | Hyponym   | Hyponym    | Hyponym    |
|----------|----------|----------|-----------|------------|------------|
| change   | affect   | turn     | flip      | be         | seem       |
| surprise | amaze    | move     | flutter   | hurt       | shoot      |
| inform   | announce | drink    | gulp      | drink      | sip        |
| request  | beg      | pull     | haul      | jump       | skip       |
| jump     | bounce   | attach   | hitch     | move       | slide      |
| break    | burst    | travel   | hitchhike | cover      | smother    |
| hide     | bury     | desire   | hope      | nap        | snooze     |
| breathe  | choke    | move     | hustle    | understand | solve      |
| throw    | chuck    | touch    | kiss      | control    | steer      |
| rise     | climb    | bend     | lean      | remove     | strip      |
| travel   | come     | walk     | limp      | try        | strive     |
| control  | command  | sit      | lounge    | drink      | suck       |
| desire   | crave    | increase | magnify   | tell       | suggest    |
| hold     | cuddle   | join     | marry     | guess      | suspect    |
| decrease | decline  | control  | operate   | annoy      | tease      |
| change   | decorate | beat     | overcome  | move       | throw      |
| leave    | depart   | beat     | overpower | pull       | tow        |
| hide     | disguise | forgive  | pardon    | move       | tow        |
| reject   | disown   | throw    | pelt      | move       | transplant |
| choose   | elect    | pull     | pluck     | walk       | tread      |
| leave    | escape   | guess    | predict   | remove     | unload     |
| move     | evict    | like     | prefer    | shake      | wag        |
| forgive  | excuse   | watch    | preview   | inform     | warn       |
| tell     | express  | gather   | reap      | rub        | wipe       |
| attach   | fasten   | appear   | reappear  | cover      | wrap       |
| leave    | flee     | move     | rearrange |            |            |
| throw    | fling    | get      | recruit   |            |            |

**Sample of hypernym/hyponym (He/Ho) nouns** (Nelson et al., 2004)

| Hyponym      | Hyponym    | Hyponym    | Hyponym      | Hyponym   | Hyponym    |
|--------------|------------|------------|--------------|-----------|------------|
| animal       | aardvark   | Instrument | compass      | animal    | primate    |
| athlete      | acrobat    | feeling    | compassion   | idea      | principle  |
| event        | activity   | group      | conference   | gift      | prize      |
| person       | actor      | person     | contractor   | plan      | project    |
| word         | adjective  | speech     | conversation | word      | pronoun    |
| person       | adult      | bottle     | flask        | christian | protestant |
| person       | adversary  | container  | flask        | fruit     | prune      |
| group        | agency     | insect     | flea         | fairy     | puck       |
| plan         | agenda     | group      | fleet        | food      | pudding    |
| loyalty      | allegiance | bubble     | foam         | wind      | puff       |
| street       | alley      | cloud      | fog          | goal      | purpose    |
| road         | alley      | word       | form         | pen       | quill      |
| book         | almanac    | animal     | fox          | fur       | raccoon    |
| singer       | alto       | group      | fraternity   | care      | treatment  |
| car          | ambulance  | crime      | fraud        | ditch     | trench     |
| science      | anatomy    | animal     | frog         | group     | tribe      |
| alcohol      | anisetette | ice        | frost        | bird      | turkey     |
| drug         | anisetette | candy      | fudge        | animal    | turtle     |
| joint        | ankle      | money      | fund         | tooth     | tusk       |
| animal       | anteater   | anger      | fury         | storm     | typhoon    |
| animal       | antelope   | hair       | fuzz         | group     | union      |
| remedy       | antidote   | bird       | gander       | part      | unit       |
| drug         | antidote   | instrument | gauge        | lover     | valentine  |
| animal       | ape        | animal     | gazelle      | vehicle   | van        |
| alcohol      | cocktail   | man        | gentleman    | jar       | vase       |
| beverage     | coffee     | science    | geology      | meat      | veal       |
| salad        | coleslaw   | hole       | leak         | poison    | venom      |
| food         | coleslaw   | material   | leather      | cereal    | wheat      |
| group        | committee  | story      | legend       | liquor    | whiskey    |
| organization | committee  | group      | legion       | woman     | widow      |
| group        | community  | fruit      | lemon        | woman     | wife       |
| group        | company    | car        | limousine    | animal    | zebra      |

## Experiment 3

From Nelson et al. (2004)

| Sample of transitive triples |          |           | Sample of intransitive triples |             |           |
|------------------------------|----------|-----------|--------------------------------|-------------|-----------|
| w1                           | w2       | w3        | w1                             | w2          | w3        |
| achievement                  | grade    | work      | a                              | alphabet    | school    |
| advice                       | cramp    | pain      | abdomen                        | cramp       | muscle    |
| agriculture                  | land     | earth     | ability                        | power       | wealth    |
| ambulance                    | sickness | hospital  | baby                           | adult       | father    |
| amount                       | money    | lot       | background                     | painting    | brush     |
| boundary                     | cross    | country   | case                           | story       | teller    |
| bounty                       | price    | money     | cashew                         | salt        | water     |
| burden                       | stress   | work      | catastrophe                    | destruction | war       |
| chili                        | soup     | food      | cattle                         | herd        | cow       |
| chine                        | dish     | food      | furniture                      | couch       | potato    |
| chore                        | work     | boring    | gal                            | seagull     | white     |
| contractor                   | business | man       | galaxy                         | space       | ship      |
| costume                      | shop     | clothes   | gang                           | war         | death     |
| creature                     | dragon   | animal    | gold                           | wealth      | happiness |
| crest                        | waves    | water     | grade                          | letter      | paper     |
| degree                       | celsius  | heat      | grounds                        | mansion     | home      |
| democracy                    | majority | vote      | holder                         | folder      | book      |
| dessert                      | food     | fat       | holiness                       | christian   | god       |
| gang                         | member   | friend    | home                           | plate       | spoon     |
| gate                         | door     | house     | hypothesis                     | statement   | question  |
| gazelle                      | giraffe  | africa    | lieutenant                     | war         | pain      |
| lord                         | prayer   | bible     | lip                            | stick       | wood      |
| lot                          | land     | ground    | male                           | boy         | blue      |
| lovers                       | two      | love      | mansion                        | dracula     | blood     |
| mate                         | marriage | husband   | mole                           | rodent      | roach     |
| matter                       | atom     | chemistry | molecule                       | science     | art       |
| mayonnaise                   | bread    | white     | month                          | time        | money     |
| moss                         | plant    | tree      | monument                       | cement      | house     |

If you cite these supplementary materials,  
please cite

Maria A. Rodriguez and Paola Merlo. Word associations and the distance properties of context-aware word embeddings, Supplementary Materials. *Proceedings of CoNLL 2020: The SIGNLL Conference on Computational Natural Language Learning*, 2020.

## References

Amos Tversky and Itamar Gati. 1978. Studies of similarity. *Cognition and categorization*. Hillsdale, Erlbaum, pages 79–98.

Douglas L Nelson, Cathy L McEvoy, and Thomas A Schreiber. 2004. The University of South Florida free association, rhyme, and word fragment norms. *Behavior Research Methods, Instruments, & Computers*, 36(3):402–407.
